# Supplementary material for: Prognostic impact of circulating tumor cell apoptosis and clusters in serial blood samples from patients with metastatic breast cancer in a prospective observational cohort
Source: PubMed Central journal article supplement (PMC4938919; doi:10.1186/s12885-016-2406-y), 2016-07-08
Supplement: 12885_2016_2406_MOESM4_ESM.pdf [file 12885_2016_2406_MOESM4_ESM.pdf]

**Additional file 4. Summary of characteristics for patients with clusters at either BL, 1-3 or 6 months (n=14)**

| <b>Patient no</b> | <b>Subtype</b> | <b>Time point</b> | <b>Nr of CTCs</b> | <b>Nr of clusters</b> | <b>Apoptotic CTC present</b> | <b>WBC-CTC present</b> | <b>Patient status</b> | <b>PFS (months)</b> | <b>First line treatment</b>        |
|-------------------|----------------|-------------------|-------------------|-----------------------|------------------------------|------------------------|-----------------------|---------------------|------------------------------------|
| 1                 | HR+            | BL                | 384               | 8                     | Yes                          | Yes                    | D                     | 2                   | Chemotherapy <sup>a</sup>          |
|                   |                | 1 mo              | 263               | 4                     | Yes                          | Yes                    |                       |                     |                                    |
|                   |                | 6 mo              | N/A D             | N/A D                 | N/A D                        | N/A D                  |                       |                     |                                    |
| 2                 | HR+            | BL                | 668               | 18                    | Yes                          | Yes                    | D                     | 1                   | Chemotherapy <sup>a</sup>          |
|                   |                | 3 mo              | N/A D             | N/A D                 | N/A D                        | N/A D                  |                       |                     |                                    |
|                   |                | 6 mo              | N/A D             | N/A D                 | N/A D                        | N/A D                  |                       |                     |                                    |
| 3                 | HR+            | BL                | 153               | 5                     | Yes                          | Yes                    | PD                    | 12                  | Chemotherapy <sup>a</sup>          |
|                   |                | 3 mo              | 15                | 0                     | No                           | No                     |                       |                     |                                    |
|                   |                | 6 mo              | 2                 | 0                     | No                           | No                     |                       |                     |                                    |
| 4                 | HR+            | BL                | 151               | 1                     | Yes                          | Yes                    | SD                    | 22                  | Hormonal therapy                   |
|                   |                | 3 mo              | 5                 | 0                     | Yes                          | Yes                    |                       |                     |                                    |
|                   |                | 6 mo              | 0                 | 0                     | No                           | No                     |                       |                     |                                    |
| 5                 | HR+            | BL                | 86                | 0                     | Yes                          | Yes                    | D                     | 6                   | Chemotherapy <sup>c</sup>          |
|                   |                | 3 mo              | 111               | 1                     | Yes                          | Yes                    |                       |                     |                                    |
|                   |                | 6 mo              | 695               | 16                    | Yes                          | Yes                    |                       |                     |                                    |
| 6                 | HR+            | BL                | 82                | 0                     | Yes                          | Yes                    | D                     | 11                  | Hormonal therapy                   |
|                   |                | 3 mo              | 181               | 1                     | Yes                          | Yes                    |                       |                     |                                    |
|                   |                | 6 mo              | 184               | 2                     | Yes                          | Yes                    |                       |                     |                                    |
| 7                 | HR+            | BL                | 9                 | 0                     | Yes                          | No                     | D                     | 6                   | Chemotherapy <sup>d</sup>          |
|                   |                | 3 mo              | 31                | 0                     | Yes                          | No                     |                       |                     |                                    |
|                   |                | 6 mo              | 765               | 1                     | Yes                          | Yes                    |                       |                     |                                    |
| 8                 | HER2+          | BL                | 311               | 4                     | Yes                          | Yes                    | PD                    | 25                  | HER2-directed therapy <sup>e</sup> |

|    |       |      |       |       |       |       |    |    |                                    |
|----|-------|------|-------|-------|-------|-------|----|----|------------------------------------|
|    |       | 3 mo | 0     | 0     | No    | No    |    |    |                                    |
|    |       | 6 mo | 0     | 0     | No    | No    |    |    |                                    |
| 9  | HER2+ | BL   | 189   | 1     | Yes   | Yes   | SD | 8  | HER2-directed therapy <sup>f</sup> |
|    |       | 3 mo | 0     | 0     | No    | No    |    |    |                                    |
|    |       | 6 mo | 0     | 0     | No    | No    |    |    |                                    |
| 10 | HER2+ | BL   | 173   | 4     | Yes   | Yes   | SD | 31 | HER2-directed therapy <sup>f</sup> |
|    |       | 3 mo | 0     | 0     | No    | No    |    |    |                                    |
|    |       | 6 mo | 0     | 0     | No    | No    |    |    |                                    |
| 11 | HER2+ | BL   | 38    | 0     | Yes   | Yes   | D  | 5  | HER2-directed therapy <sup>f</sup> |
|    |       | 3 mo | 9     | 0     | Yes   | No    |    |    |                                    |
|    |       | 6 mo | 183   | 1     | Yes   | Yes   |    |    |                                    |
| 12 | TN    | BL   | 104   | 2     | Yes   | Yes   | D  | 7  | Chemotherapy <sup>b</sup>          |
|    |       | 3 mo | 75    | 1     | Yes   | No    |    |    |                                    |
|    |       | 6 mo | N/A W | N/A W | N/A W | N/A W |    |    |                                    |
| 13 | TN    | BL   | 39    | 1     | Yes   | No    | D  | 11 | Chemotherapy <sup>b</sup>          |
|    |       | 3 mo | 87    | 0     | Yes   | Yes   |    |    |                                    |
|    |       | 6 mo | 2     | 0     | Yes   | No    |    |    |                                    |
| 14 | TN    | BL   | 71    | 0     | Yes   | Yes   | PD | 5  | Chemotherapy <sup>b</sup>          |
|    |       | 3 mo | 144   | 1     | Yes   | Yes   |    |    |                                    |
|    |       | 6 mo | 57    | 0     | Yes   | Yes   |    |    |                                    |

Foot-note to treatment regimen:

<sup>a</sup> Poly-chemotherapy with anthracycline (FEC)

<sup>b</sup> Platinum containing regimen (carboplatinum) + gemcitabine

<sup>c</sup> Weekly paclitaxel single therapy

<sup>d</sup> Oral chemotherapy (capecitabine)

<sup>e</sup> Her-2-directed therapy – single blockade (trastuzumab) + chemotherapy

<sup>f</sup> Her-2-directed therapy – double blockade (trastuzumab + pertuzumab) + chemotherapy

HR+, hormone receptor positive; HER2+, human epidermal growth factor receptor 2 positive; TN, triple negative; BL, baseline; mo, months; N/A D, not available patient diseased; WBC-CTC, white blood cells associated with CTC; N/A W, not available patient withdrew from the study; D, diseased; PD, progressive disease; SD, stable disease.
