# Supplementary material for: Prognostic impact of circulating tumor cell apoptosis and clusters in serial blood samples from patients with metastatic breast cancer in a prospective observational cohort
Source: Springer Nature journal article supplement (doi:10.1186/s12885-016-2406-y), 2016-07-08
Supplement: MOESM3 [file 10351830]

|                              |         |    | Apoptosis |                              | Cluster |                              | WBC-CTC |                              | Visceral met |                              | Stage IV at diagnosis |                                 | Number of CTC |
|------------------------------|---------|----|-----------|------------------------------|---------|------------------------------|---------|------------------------------|--------------|------------------------------|-----------------------|---------------------------------|---------------|
|                              |         |    | Yes       | No                           | Yes     | No                           | Yes     | No                           | Yes          | No                           | Yes                   | No                              | Median        |
| <b>6 months</b>              |         |    | 15        | 26                           | 4       | 37                           | 8       | 33                           | 14           | 27                           | 7                     | 34                              | 1             |
| <b>Apoptosis</b>             | Yes     | 15 |           | 4                            | 11      | 7                            | 8       | 4                            | 11           | 2                            | 13                    | 48                              |               |
|                              | No      | 26 | -         | 0                            | 26      | 1                            | 25      | 10                           | 16           | 5                            | 21                    | 0                               |               |
|                              | Missing | 11 |           | <b>P = 0.013<sup>b</sup></b> |         | <b>P = 0.002<sup>b</sup></b> |         | <i>P</i> = 0.44 <sup>d</sup> |              | <i>P</i> = 1.00 <sup>b</sup> |                       | <b>P &lt; 0.001<sup>c</sup></b> |               |
| <b>Cluster</b>               | Yes     | 4  |           |                              |         | 4                            | 0       | 3                            | 1            | 0                            | 4                     | 440                             |               |
|                              | No      | 37 |           | -                            |         | 4                            | 33      | 11                           | 26           | 7                            | 30                    | 1                               |               |
|                              | Missing | 11 |           |                              |         | <b>P = 0.001<sup>b</sup></b> |         | <i>P</i> = 0.11 <sup>b</sup> |              | <i>P</i> = 1.00 <sup>b</sup> |                       | <b>P = 0.001<sup>c</sup></b>    |               |
| <b>WBC-CTC</b>               | Yes     | 8  |           |                              |         |                              |         | 3                            | 5            | 1                            | 7                     | 153                             |               |
|                              | No      | 33 |           |                              |         | -                            |         | 11                           | 22           | 6                            | 27                    | 0                               |               |
|                              | Missing | 11 |           |                              |         |                              |         | <i>P</i> = 1.00 <sup>b</sup> |              | <i>P</i> = 1.00 <sup>b</sup> |                       | <b>P &lt; 0.001<sup>c</sup></b> |               |
| <b>Visceral met</b>          | Yes     | 14 |           |                              |         |                              |         |                              |              | 1                            | 13                    | 1                               |               |
|                              | No      | 27 |           |                              |         |                              |         | -                            |              | 6                            | 21                    | 1                               |               |
|                              | Missing | 11 |           |                              |         |                              |         |                              |              | <i>P</i> = 0.39 <sup>b</sup> |                       | <i>P</i> = 0.86 <sup>c</sup>    |               |
| <b>Stage IV at diagnosis</b> | Yes     | 7  |           |                              |         |                              |         |                              |              |                              |                       | 0                               |               |
|                              | No      | 34 |           |                              |         |                              |         |                              |              | -                            |                       | 1                               |               |
|                              | Missing | 11 |           |                              |         |                              |         |                              |              |                              |                       | <i>P</i> = 0.11 <sup>c</sup>    |               |
| <b>Number of CTC</b>         | Median  | 1  |           |                              |         |                              |         |                              |              |                              |                       | -                               |               |

<sup>a</sup> Apoptotic CTC were only found as single cells, not within clusters

<sup>b</sup> Fishers exact test

<sup>c</sup> Mann-Whitney U-test

<sup>d</sup> Pearson Chi Square test

WBC-CTC, white blood cells associated with CTC; met, metastasis
